# Supplementary material
Source: Springer Nature journal article supplement (https://www.springermedizin.de/resource/supplementary/12874_2008_354_MOESM2_ESM.pdf/9434296)
Supplement: MOESM2 [file 9434296]

-----Web- KIDMAP-----

Ability = -0.48 logits

SE = 0.36

Infit MNSQ = 2.35 (within < 2.0)

Outfit MNSQ = 2.37

Infit ZSTD = 2.94 (within +/- 2.58)

Outfit ZSTD = 2.99

Test Reliability = 0.94

Person Reliability = 0.98

| prob. | Harder | Achieved | Harder | Not Achieved | measures | freq(%)      | each # = 2.6 |
|-------|--------|----------|--------|--------------|----------|--------------|--------------|
|       |        |          |        |              | 9.2      | 25(6)#####   |              |
|       |        |          |        |              | 5.1      | 8(20)###.    |              |
|       |        |          |        |              | 5        | 1(20).       |              |
| 0.01  |        | 20.4^    |        |              | 4.9      | 9(22)###.    |              |
|       |        |          |        |              | 4.8      | 4(23)##      |              |
| 0.01  |        | 12.4^    |        |              | 4.7      | 5(24)##      |              |
|       |        |          |        |              | 4.6      | 1(24).       |              |
|       |        |          |        |              | 4.5      | 11(26)####.  |              |
|       |        |          |        |              | 1.8      | 2(65).       |              |
|       |        |          |        |              | 1.7      | 12(68)#####  |              |
|       |        |          |        |              | 1.6      |              |              |
|       |        |          |        |              | 1.5      | 14(71)#####. |              |
|       |        |          |        |              | 1.4      | 3(72).       |              |
|       |        |          |        |              | 1.3      | 12(74)#####  |              |
|       |        |          |        |              | 1.2      |              |              |
|       |        |          |        |              | 1.1      | 13(77)#####  |              |
|       |        |          |        |              | 1        | 8(79)###.    |              |
| 0.2   |        | 9.4      |        |              | 0.9      | 2(80).       |              |
| 0.24  |        | 10.3     |        |              | 0.8      | 8(81)###.    |              |
| 0.25  |        |          |        | 8.4.3        | 0.7      | 3(82).       |              |
| 0.27  |        |          |        | 11.4.3       | 0.6      | 10(84)####   |              |
| 0.29  | 15.3   | 6.4      |        |              | 0.5      | 3(85).       |              |
| 0.31  |        |          |        | 1.4.3        | 0.4      |              |              |
| 0.34  |        |          |        | 14.4.3       | 0.3      | 4(86)##      |              |
|       |        |          |        |              | 0.2      | 11(88)####.  |              |
|       |        |          |        |              | 0.1      | 4(89)##      |              |
|       |        |          |        |              | 0        | 7(91)###     |              |
| 0.41  |        | 5.4      |        |              | -0.1     | 5(92)##      |              |
|       |        |          |        |              | -0.2     | 6(93)##.     |              |
| 0.46  |        |          |        | 18.4.3       | -0.3     |              |              |
|       |        |          | XXX    |              | -0.4     | 1(93).       |              |
|       |        |          |        |              | -0.5     | 4(94)##*     |              |
|       |        |          |        |              | -0.6     | 2(95).       |              |
|       |        |          |        |              | -0.7     | 3(95).       |              |
|       |        |          |        |              | -0.8     | 2(96).       |              |
|       |        |          |        |              | -1.7     |              |              |
|       |        |          |        |              | -1.8     | 2(99).       |              |
| 0.81  |        |          |        | 13.3.2       | -1.9     |              |              |
|       |        |          |        |              | -2       | 1(100).      |              |
| 0.83  | 2.3    | 21.2     |        |              | -2.1     | 1(100).      |              |
| 0.85  |        |          |        | 4.3.2        | -2.2     |              |              |
|       |        |          |        |              | -2.3     |              |              |
| 0.87  |        |          |        | 7.3.2        | -2.4     |              |              |
| 0.88  |        |          |        | 19.3.2       | -2.5     |              |              |
|       |        |          |        |              | -2.6     |              |              |
| 0.9   |        |          |        | 17.3.2*      | -2.7     |              |              |
|       |        |          |        |              | -7.5     |              |              |
|       |        |          |        |              | -7.6     |              |              |

--Expected Score(Easier)-----Unexpected Score(Less) -----
